# Supplementary material for: EARLIER: an observational study to evaluate the use of cinacalcet in incident hemodialysis patients with secondary hyperparathyroidism in daily clinical practice
Source: Springer Nature journal article supplement (doi:10.1007/s10354-015-0379-0), 2015-08-24
Supplement: MOESM1 [file 14928740]

**EARLIER – an observational study to evaluate the use of cinacalcet in incident hemodialysis patients with secondary hyperparathyroidism in daily clinical practice**

**EARLIER – Beobachtungsstudie zur Evaluierung der Verwendung von Cinacalcet bei inzidenten Hämodialysepatienten mit sekundärem Hyperparathyreoidismus in der klinischen Praxis**

**SUPPLEMENTARY MATERIAL**

**Sensitivity analysis estimating the impact of missing data**

**Table S1.**  Baseline Characteristics for FAS, EAS, and CAS

*CAS* complete analysis set; *EAS* evaluable analysis set; *FAS* full analysis set; *iPTH* intact parathyroid hormone

*The mean is based on n=113 patients with available iPTH values at baseline, the percentages are based on n=146 patients including those with missing iPTH values. **The number of corrected calcium values exceeds the number of albumin values in a very few instances, because corrected Ca was reported on the CRF

|  | **FAS** | | | **EAS** | | | **CAS** | | |
| --- | --- | --- | --- | --- | --- | --- | --- | --- | --- |
| **Parameter** | **N** | **Median (IQR) or N (%)** | **Mean ± SD** | **N** | **Median (IQR) or N (%)** | **Mean ± SD** | **N** | **Median (IQR) or N (%)** | **Mean ± SD** |
| Age, years | 145 | 58.0 (44.0-67.0) | 56.9 ± 15.9 | 112 | 58.0 (45.8-70.0) | 57.3 ± 16.0 | 76 | 59.0 (45.8-72.0) | 58.3±17.1 |
| Gender: Male/Female | 146 | 90 (62%)/56 (38)% |  | 113 | 70 (62%)/43 (38)% |  | 77 | 47 (61%)/30 (39%) |  |
| Height, cm | 140 | 169 (165-178) | 170 ± 8.9 | 107 | 169 (165-176) | 170 ± 8.1 | 72 | 169 (165-175) | 170±7.9 |
| Weight, kg | 145 | 74 (60-87) | 76 ± 19.7 | 112 | 73 (60-84) | 75 ± 19.3 | 76 | 73 (60-81.5) | 74±19.1 |
| *Etiology of renal failure* |  |  |  |  |  |  |  |  |  |
| Diabetes mellitus type 2 | 146 | 22 (15%) |  | 113 | 15 (13%) |  | 77 | 11 (14%) |  |
| Hypertension/vascular | 146 | 40 (27%) |  | 113 | 31 (27%) |  | 77 | 23 (30%) |  |
| Polycystic kidney disease | 146 | 10 (7%) |  | 113 | 7 (6%) |  | 77 | 7 (9%) |  |
| Unknown | 146 | 11 (8%) |  | 113 | 9 (8%) |  | 77 | 6 (8%) |  |
| Glomerulonephritis | 146 | 27 (18%) |  | 113 | 20 (18%) |  | 77 | 9 (12%) |  |
| Tumor | 146 | 0 (0%) |  | 113 | 0 (0%) |  | 77 | 0 (0%) |  |
| Interstitial nephropathy | 146 | 8 (5%) |  | 113 | 8 (7%) |  | 77 | 3 (4%) |  |
| Other | 146 | 28 (19%) |  | 113 | 23 (20%) |  | 77 | 18 (23%) |  |
| *Other medical history* |  |  |  |  |  |  |  |  |  |
| Cardiovascular disease | 146 | 76 (52%) |  | 113 | 56 (50%) |  | 77 | 40 (52%) |  |
| Diabetes | 146 | 38 (26%) |  | 113 | 29 (26%) |  | 77 | 18 (23%) |  |
| Kidney transplantation | 146 | 25 (17%) |  | 113 | 15 (13%) |  | 77 | 10 (13%) |  |
| Parathyroidectomy | 146 | 2 (1%) |  | 113 | 2 (2%) |  | 77 | 1 (1%) |  |
| Dialysis vintage (days) | 146 | 106 (33-229) | 140 ± 119 | 113 | 92 (33-213) | 129 ± 110 | 77 | 99 (30-213) |  |
| Dialysis vintage <6 months | 146 | 93 (64%) |  | 113 | 77 (68%) |  | 77 | 52 (68%) |  |
| Dialysis vintage >6 months | 146 | 53 (36%) |  | 113 | 36 (32%) |  | 77 | 25 (32%) |  |
|  |  |  |  |  |  |  |  |  |  |
| *Laboratory parameters* |  |  |  |  |  |  |  |  |  |
| iPTH, pg/mL | 113 | 611 (443-855) | 726 ± 437 | 90 | 633 (467-903) | 760 ± 463 | 77 | 611 (444-856) | 727±396 |
| iPTH <300 pg/mL* | 146 | 6 (4%) |  | 113 | 4 (4%) |  | 77 | 3 (4%) |  |
| iPTH 300-499 pg/mL* | 146 | 33 (23%) |  | 113 | 25 (22%) |  | 77 | 24 (31%) |  |
| iPTH 500-800 pg/mL* | 146 | 39 (27%) |  | 113 | 30 (27%) |  | 77 | 26 (34%) |  |
| iPTH >800 pg/mL* | 146 | 35 (24%) |  | 113 | 31 (27%) |  | 77 | 24 (31%) |  |
| N/A* | 146 | 33 (23%) |  | 113 | 23 (20%) |  | - | - |  |
| Phosphorus, mmol/L | 124 | 2.05 (1.70-2.48) | 2.17 ± 0.68 | 98 | 2.07 (1.70-2.46) | 2.18 ± 0.68 | 72 | 2.07 (1.80-2.45) | 2.18±0.65 |
| Calcium, total, mmol/L | 101 | 2.20 (2.05-2.33) | 2.20 ± 0.23 | 81 | 2.21 (2.04-2.33) | 2.20 ± 0.23 | 61 | 2.20 (2.05-2.28) | 2.17±0.20 |
| Albumin, g/L | 35 | 40.0 (36.5-42.0) | 39.0 ± 4.6 | 29 | 40.0 (37.0-42.0) | 39.2 ± 4.9 | 23 | 40.0 (36.0-41.5) | 38.7±4.9 |
| Calcium (corrected), mmol/L**** | 36 | 2.33 (2.22-2.44) | 2.33 ± 0.17 | 30 | 2.33 (2.21-2.49) | 2.34 ± 0.18 | 24 | 2.32 (2.17-2.44) | 2.31±0.15 |
| Ca (corr) x P, mmol2/L2 | 36 | 4.36 (3.72-5.03) | 4.67 ± 1.38 | 30 | 4.46 (3.73-5.58) | 4.80 ± 1.45 | 24 | 4.75 (3.78-5.74) | 4.85±1.30 |
| Dialysate calcium, mmol/L | 146 | 1.50 (1.25-1.50) | 1.40 ± 0.14 | 113 | 1.50 (1.25-1.50) | 1.39 ± 0.13 | 77 | 1.50 (1.25-1.50) | 1.40±0.13 |
|  |  |  |  |  |  |  |  |  |  |
| *Concomitant medications* |  |  |  |  |  |  |  |  |  |
| Phosphate binder | 146 | 120 (82%) |  |  | 95 (84%) |  | 77 | 63 (82%) |  |
| Calcium-based binder | 146 | 52 (36%) |  |  | 39 (35%) |  | 77 | 27 (35%) |  |
| Aluminium-based binder | 146 | 14 (10%) |  |  | 12 (11%) |  | 77 | 6 (8%) |  |
| Sevelamer | 146 | 72 (49%) |  |  | 57 (50%) |  | 77 | 38 (49%) |  |
| Lanthanum | 146 | 12 (8%) |  |  | 11 (10%) |  | 77 | 8 (10%) |  |
| Vitamin D sterols | 146 | 97 (66%) |  |  | 84 (74%) |  | 77 | 59 (77%) |  |

**Table S2.** Sensitivity analysis for percentage of patients below, within and above K/DOQI target for iPTH showing FAS (n=146), EAS (n=113) and CAS (n=77)

*CAS* complete analysis set; *EAS* evaluable analysis set; *FAS* full analysis set; *iPTH* intact parathyroid hormone

| **FAS** | **Month -6** | **Baseline** | **Month 12** |
| --- | --- | --- | --- |
| Below | 8% | 2% | 26% |
| Target | 16% | 4% | 36% |
| Above | 76% | 95% | 38% |
|  |  |  |  |
| **EAS** | **Month -6** | **Baseline** | **Month 12** |
| Below | 11% | 1% | 26% |
| Target | 14% | 3% | 38% |
| Above | 76% | 96% | 36% |
|  |  |  |  |
| **CAS** | **Month -6** | **Baseline** | **Month 12** |
| Below | 17% | 0% | 25% |
| Target | 17% | 4% | 36% |
| Above | 65% | 96% | 39% |

**Table S3.** Sensitivity analysis for phosphate binder and vitamin D usage

*CAS* complete analysis set; *EAS* evaluable analysis set; *FAS* full analysis set

|  | **FAS** | | | **EAS** | | | **CAS** | | |
| --- | --- | --- | --- | --- | --- | --- | --- | --- | --- |
|  | **Number (%) of patients** | | | **Number (%) of patients** | | | **Number (%) of patients** | | |
|  | **-6months** | **Baseline** | **12 months** | **-6months** | **Baseline** | **12 months** | **-6months** | **Baseline** | **12 months** |
|  | **n=146** | **n=146** | **n=121** | **n=113** | **n=113** | **n=113** | **n=77** | **n=77** | **n=77** |
| Phosphate binder | 81 (55%) | 120 (82%) | 106 (88%) | 62 (55%) | 95 (84%) | 98 (87%) | 40 (52%) | 63 (82%) | 67 (87%) |
| Calcium-based binder* | 51 (35%) | 52 (36%) | 35 (29%) | 36 (32%) | 39 (35%) | 32 (28%) | 25 (32%) | 27 (35%) | 22 (29%) |
| Aluminium-based binder* | 10 (7%) | 14 (10%) | 16 (13%) | 9 (8%) | 12 (11%) | 16 (14%) | 4 (5%) | 6 (8%) | 6 (8%) |
| Sevelamer* | 37 (25%) | 72 (49%) | 76 (63%) | 29 (26%) | 57 (50%) | 69 (61%) | 20 (26%) | 38 (49%) | 50 (65%) |
| Lanthanum* | 3 (2%) | 12 (8%) | 17 (14%) | 3 (3%) | 11 (10%) | 17 (15%) | 3 (4%) | 8 (10%) | 15 (19%) |
| Ca-based + sevelamer | 12 (8%) | 14 (10%) | 12 (10%) | 8 (7%) | 9 (8%) | 9 (10%) | 7 (9%) | 6 )8%) | 8 (10%) |
| Ca-based + Al-based | 3 (2%) | 3 (2%) | 3 (2%) | 2 (2%) | 2 (2%) | 3 (3%) | 2 (3%) | 2 (3%) | 2 (3%) |
| Sevelamer + Al-based | 3 (2%) | 5 (3%) | 11 (9%) | 3 (3%) | 5 (4%) | 11 (10%) | 1 (1%) | 2 (3%) | 4 (5%) |
|  |  |  |  |  |  |  |  |  |  |
| Vitamin D sterols | 64 (44%) | 97 (66%) | 89 (74%) | 52 (46%) | 84 (74%) | 85 (75%) | 36 (47%) | 59 (77%) | 61 (79%) |
| Calcitriol | 42 (29%) | 74 (51%) | 63 (52%) | 36 (32%) | 63 (56%) | 61 (54%) | 27 (35%) | 43 (56%) | 43 (56%) |
| Alfacalcidol | 20 (14%) | 18 (12%) | 14 (12%) | 14 (12%) | 16 (14%) | 14 (12%) | 8 (10%) | 12 (16%) | 12 (16%) |
| Paricalcitol | 2 (1%) | 5 (3%) | 12 (10%) | 2 (2%) | 5 (4%) | 10 (9%) | 1 (1%) | 4 (5%) | 6 (8%) |

**Figure S1.** Sensitivity analysis for iPTH over time

*CAS* complete analysis set; *EAS* evaluable analysis set; *FAS* full analysis set; *iPTH* intact parathyroid hormone

**
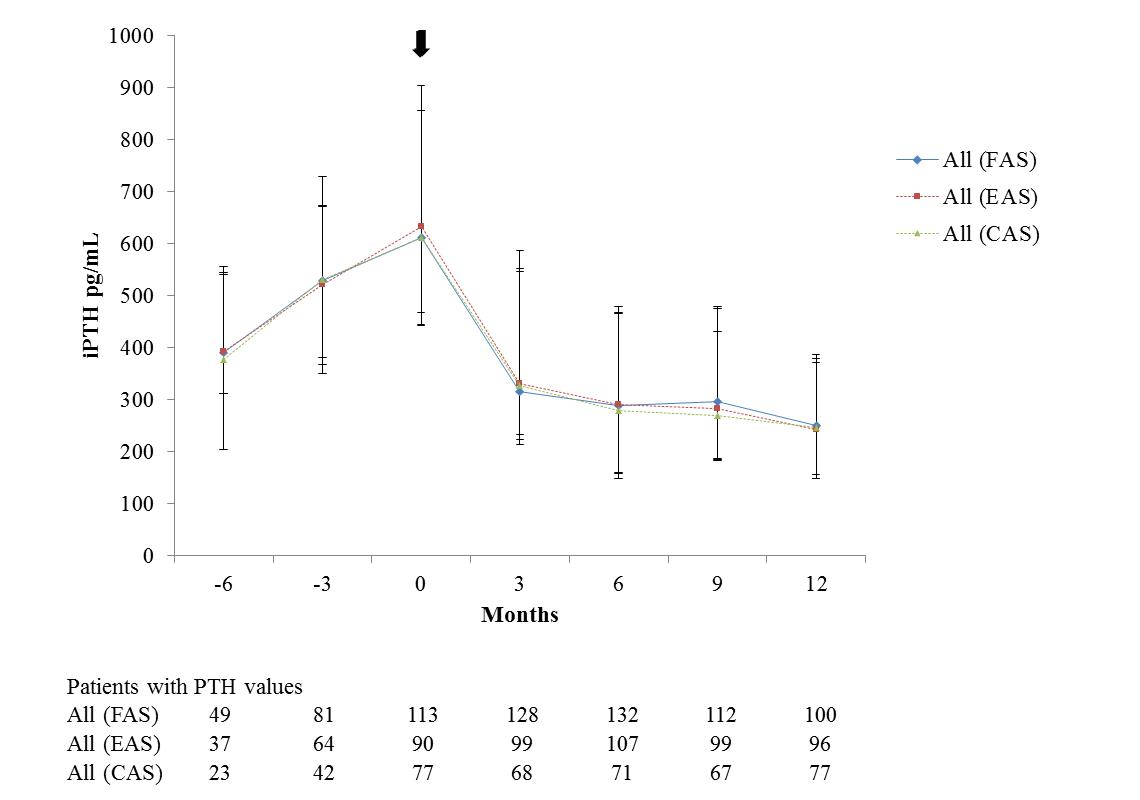
**

**Figure S2.** Sensitivity analysis for cinacalcet dose over time

*CAS* complete analysis set; *EAS* evaluable analysis set; *FAS* full analysis set

**
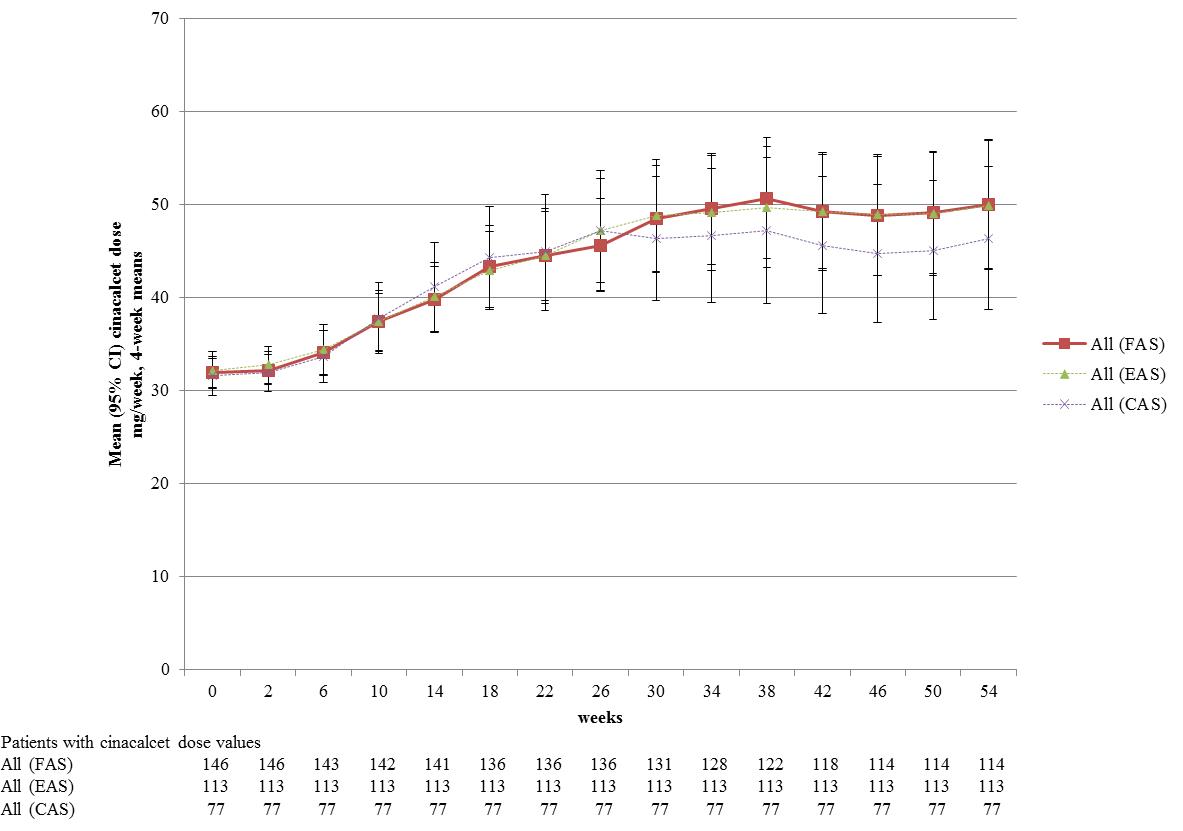
**

**KDIGO target achievement**

**Figure S3.** Percentage of patients achievingKDIGO targets for iPTH (120-600 pg/mL), Phosphorus (1.13-1.48 mmol/L) and Calcium (total; 2.1-2.4 mmol/L), based on ‘normal’ values from an Austrian registry ([1](#_ENREF_1)). *BL* baseline (timepoint at which cinacalcet was initiated), *Ca* calcium, *iPTH* intact parathyroid hormone, *M* = month, *P* phosphorus


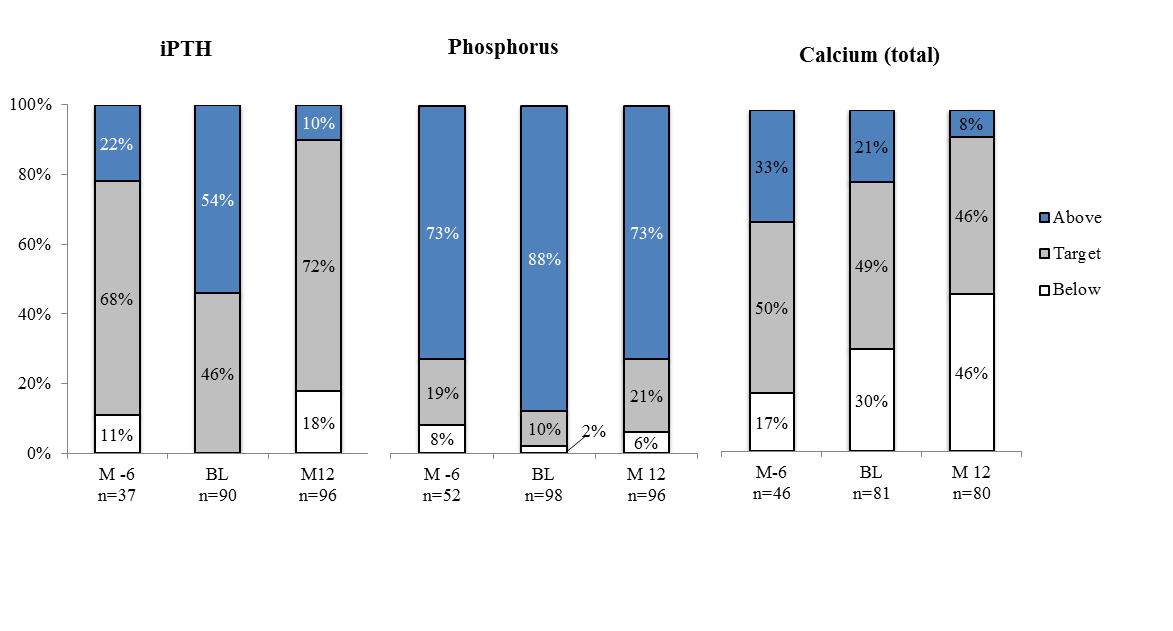


**Total Calcium**

**Table S4. Evolution of total Ca (mmol/L): median (Q1, Q3)**

| **Month** | **Mild** | | **Moderate** | | **Severe** | |
| --- | --- | --- | --- | --- | --- | --- |
| **N** | **Ca** | **N** | **Ca** | **N** | **Ca** |
| **-6** | 10 | 2.16  (2.09-2.22) | 11 | 2.38  (2.26-2.47) | 12 | 2.23  (2.15-2.40) |
| **-3** | 14 | 2.18  (2.07-2.29) | 22 | 2.25  (2.15-2.33) | 14 | 2.22  (2.01-2.42) |
| **0** | 21 | 2.17  (2.03-2.31) | 21 | 2.21 (2.13-2.23) | 26 | 2.22  (2.04-2.41) |
| **3** | 21 | 2.17  (2.05-2.23) | 22 | 2.11 (1.95-2.19) | 25 | 2.04  (1.91-2.18) |
| **6** | 20 | 2.12  (1.95-2.25) | 20 | 2.09  (1.94-2.16) | 25 | 2.10  (1.95-2.24) |
| **9** | 21 | 2.09  (1.97-2.21) | 19 | 2.01  (1.96-2.20) | 25 | 2.08  (1.94 -2.30) |
| **12** | 20 | 2.09  (2.01-2.16) | 20 | 2.15  (2.09-2.25) | 21 | 2.06  (1.97-2.24) |

**References**

1. Kramar R. Österreichisches Dialyse- und Transplantationsregister, ÖDTR, Jahresbericht 2012 der Österreichischen Gesellschaft für Nephrologie 2013 [cited 2014 30 April]. Available from: <http://www.nephro.at/oedr2012/oedr2012.htm>.
